# Supplementary material
Source: PubMed Central journal article supplement (PMC4558869)

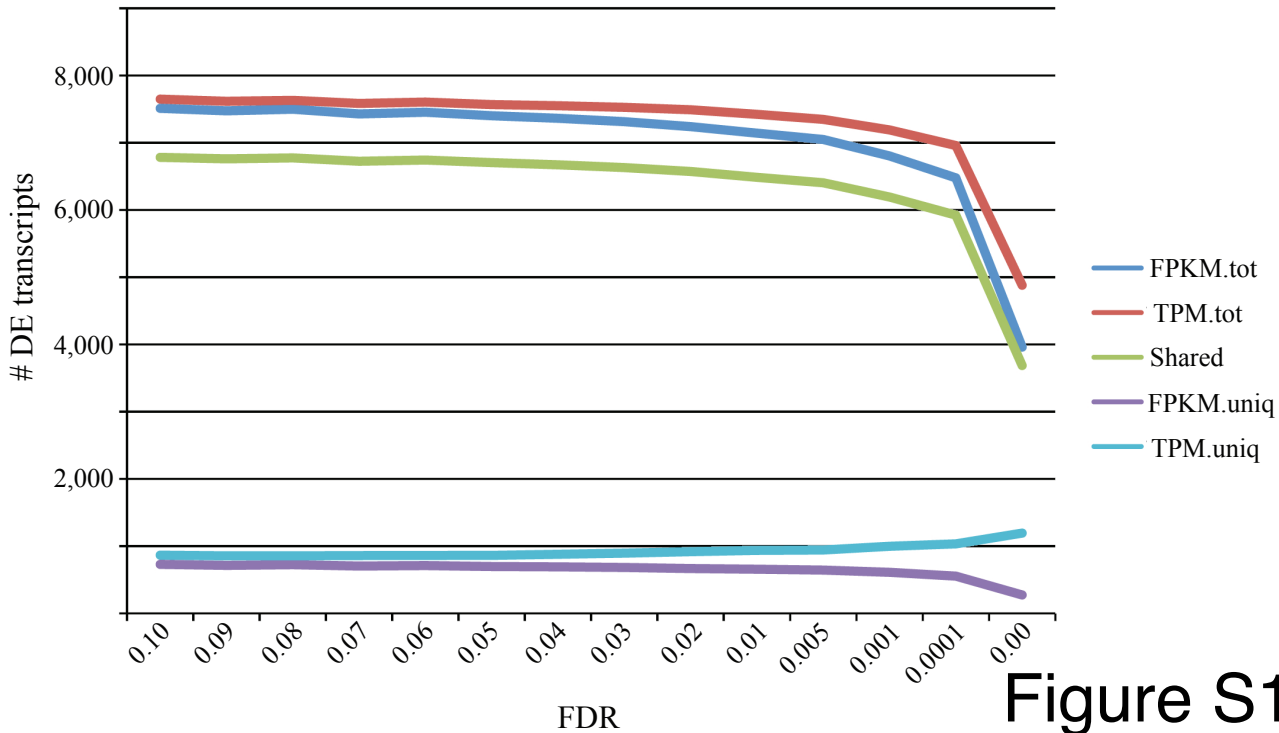

Figure S1

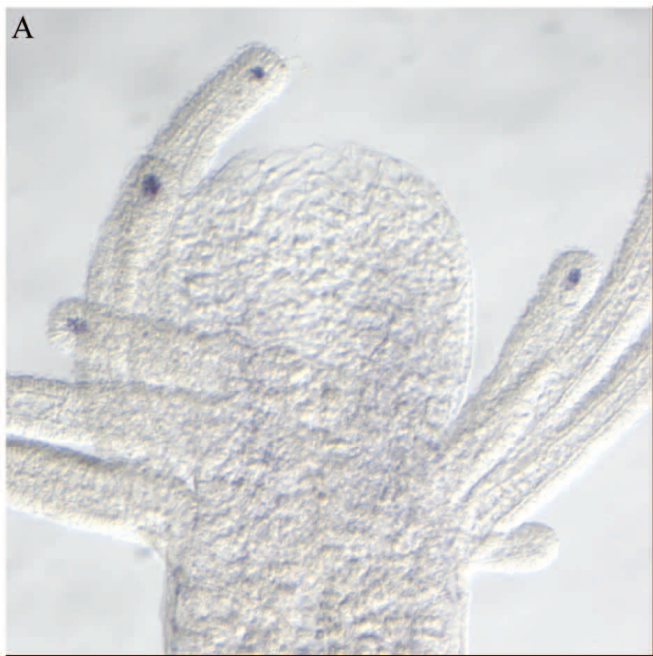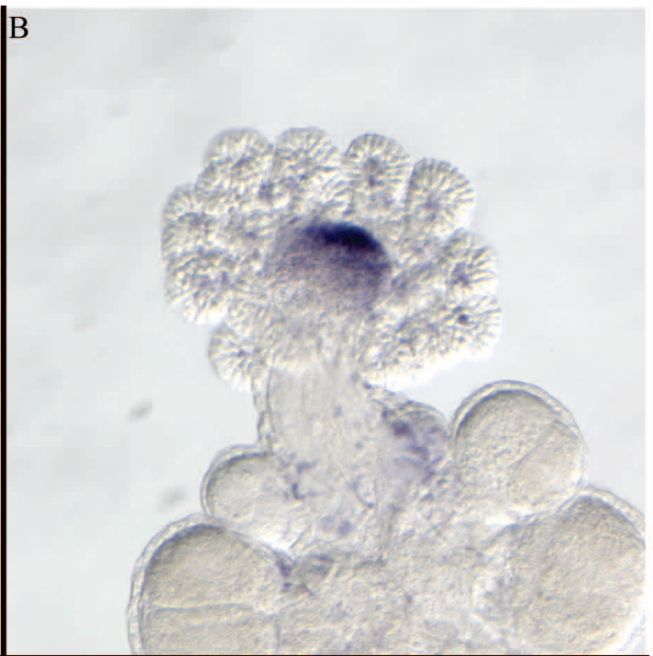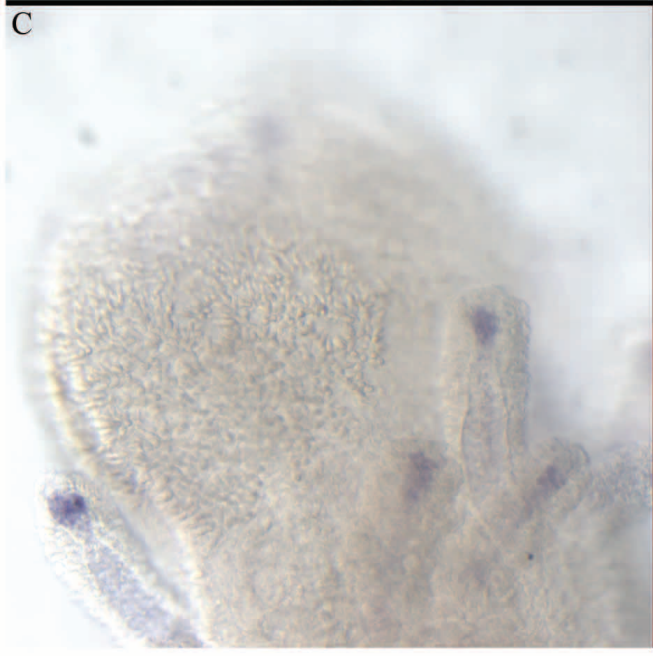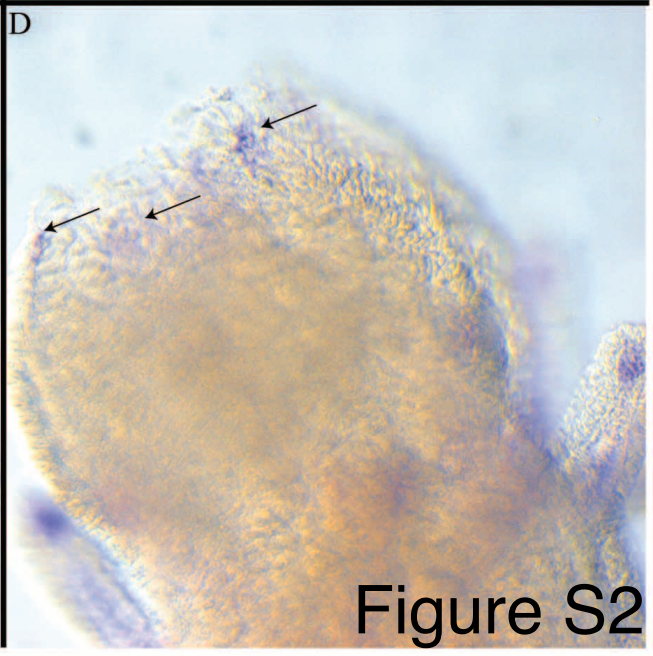

Figure S2



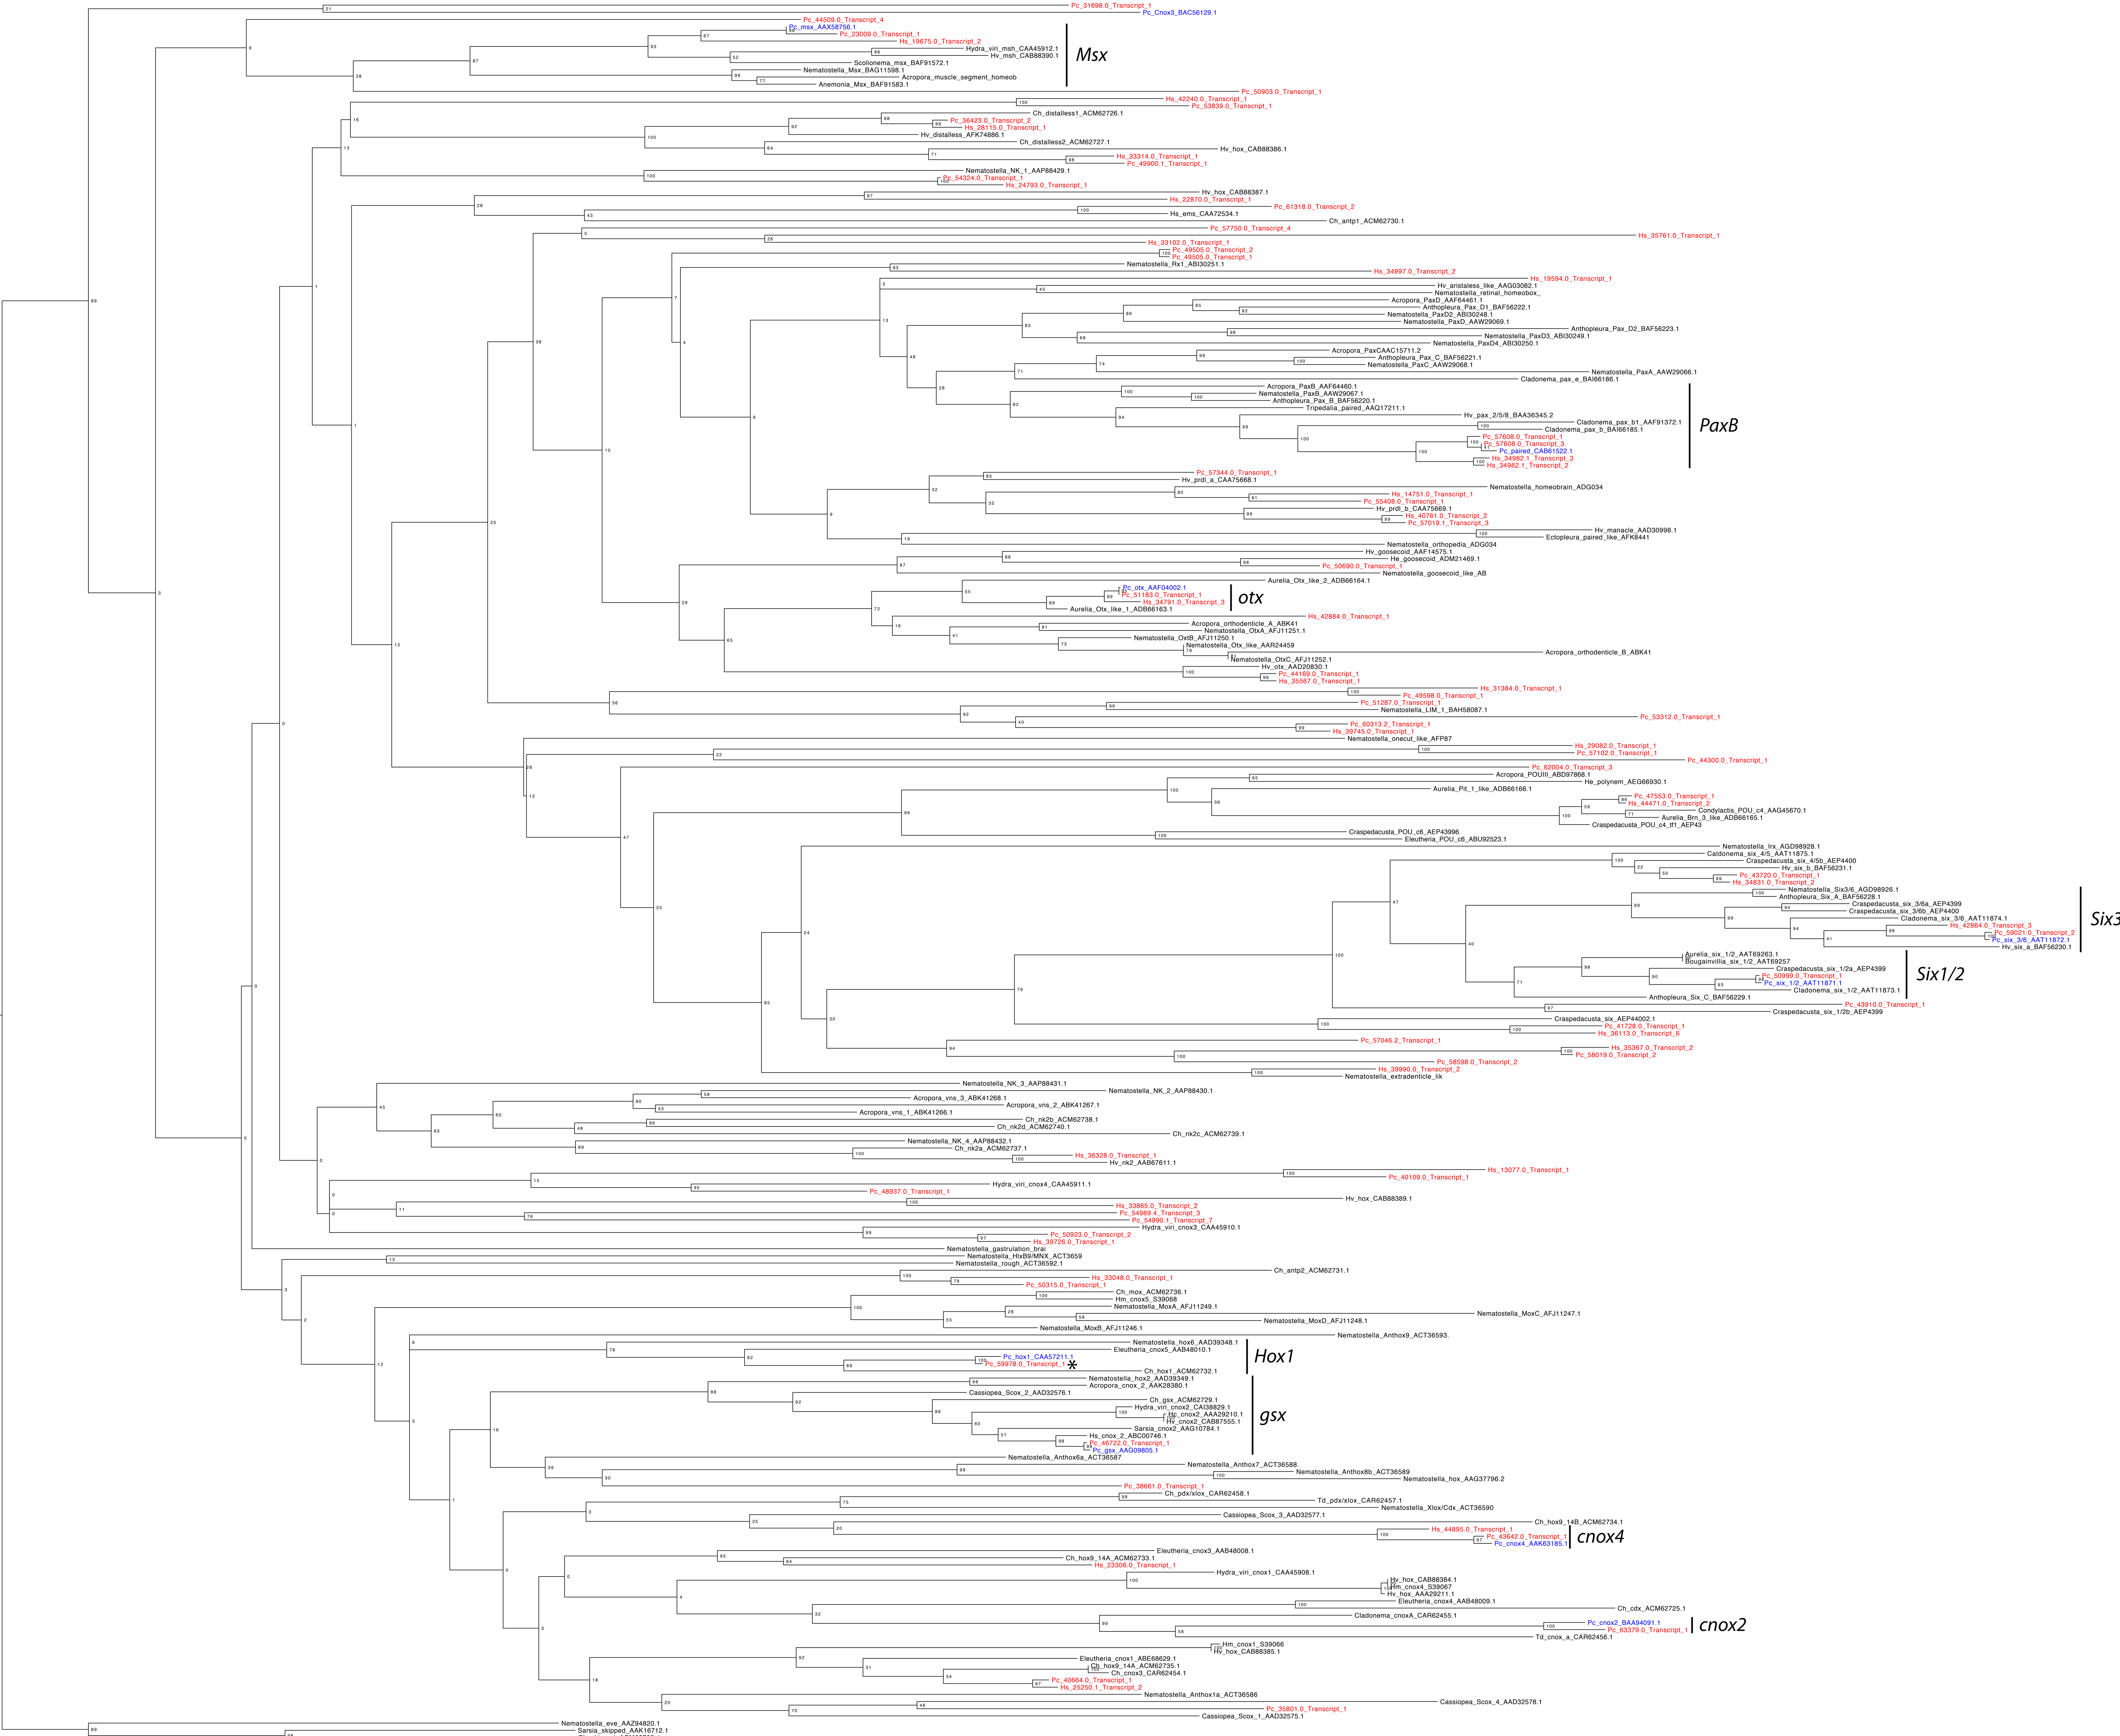

Figure S3



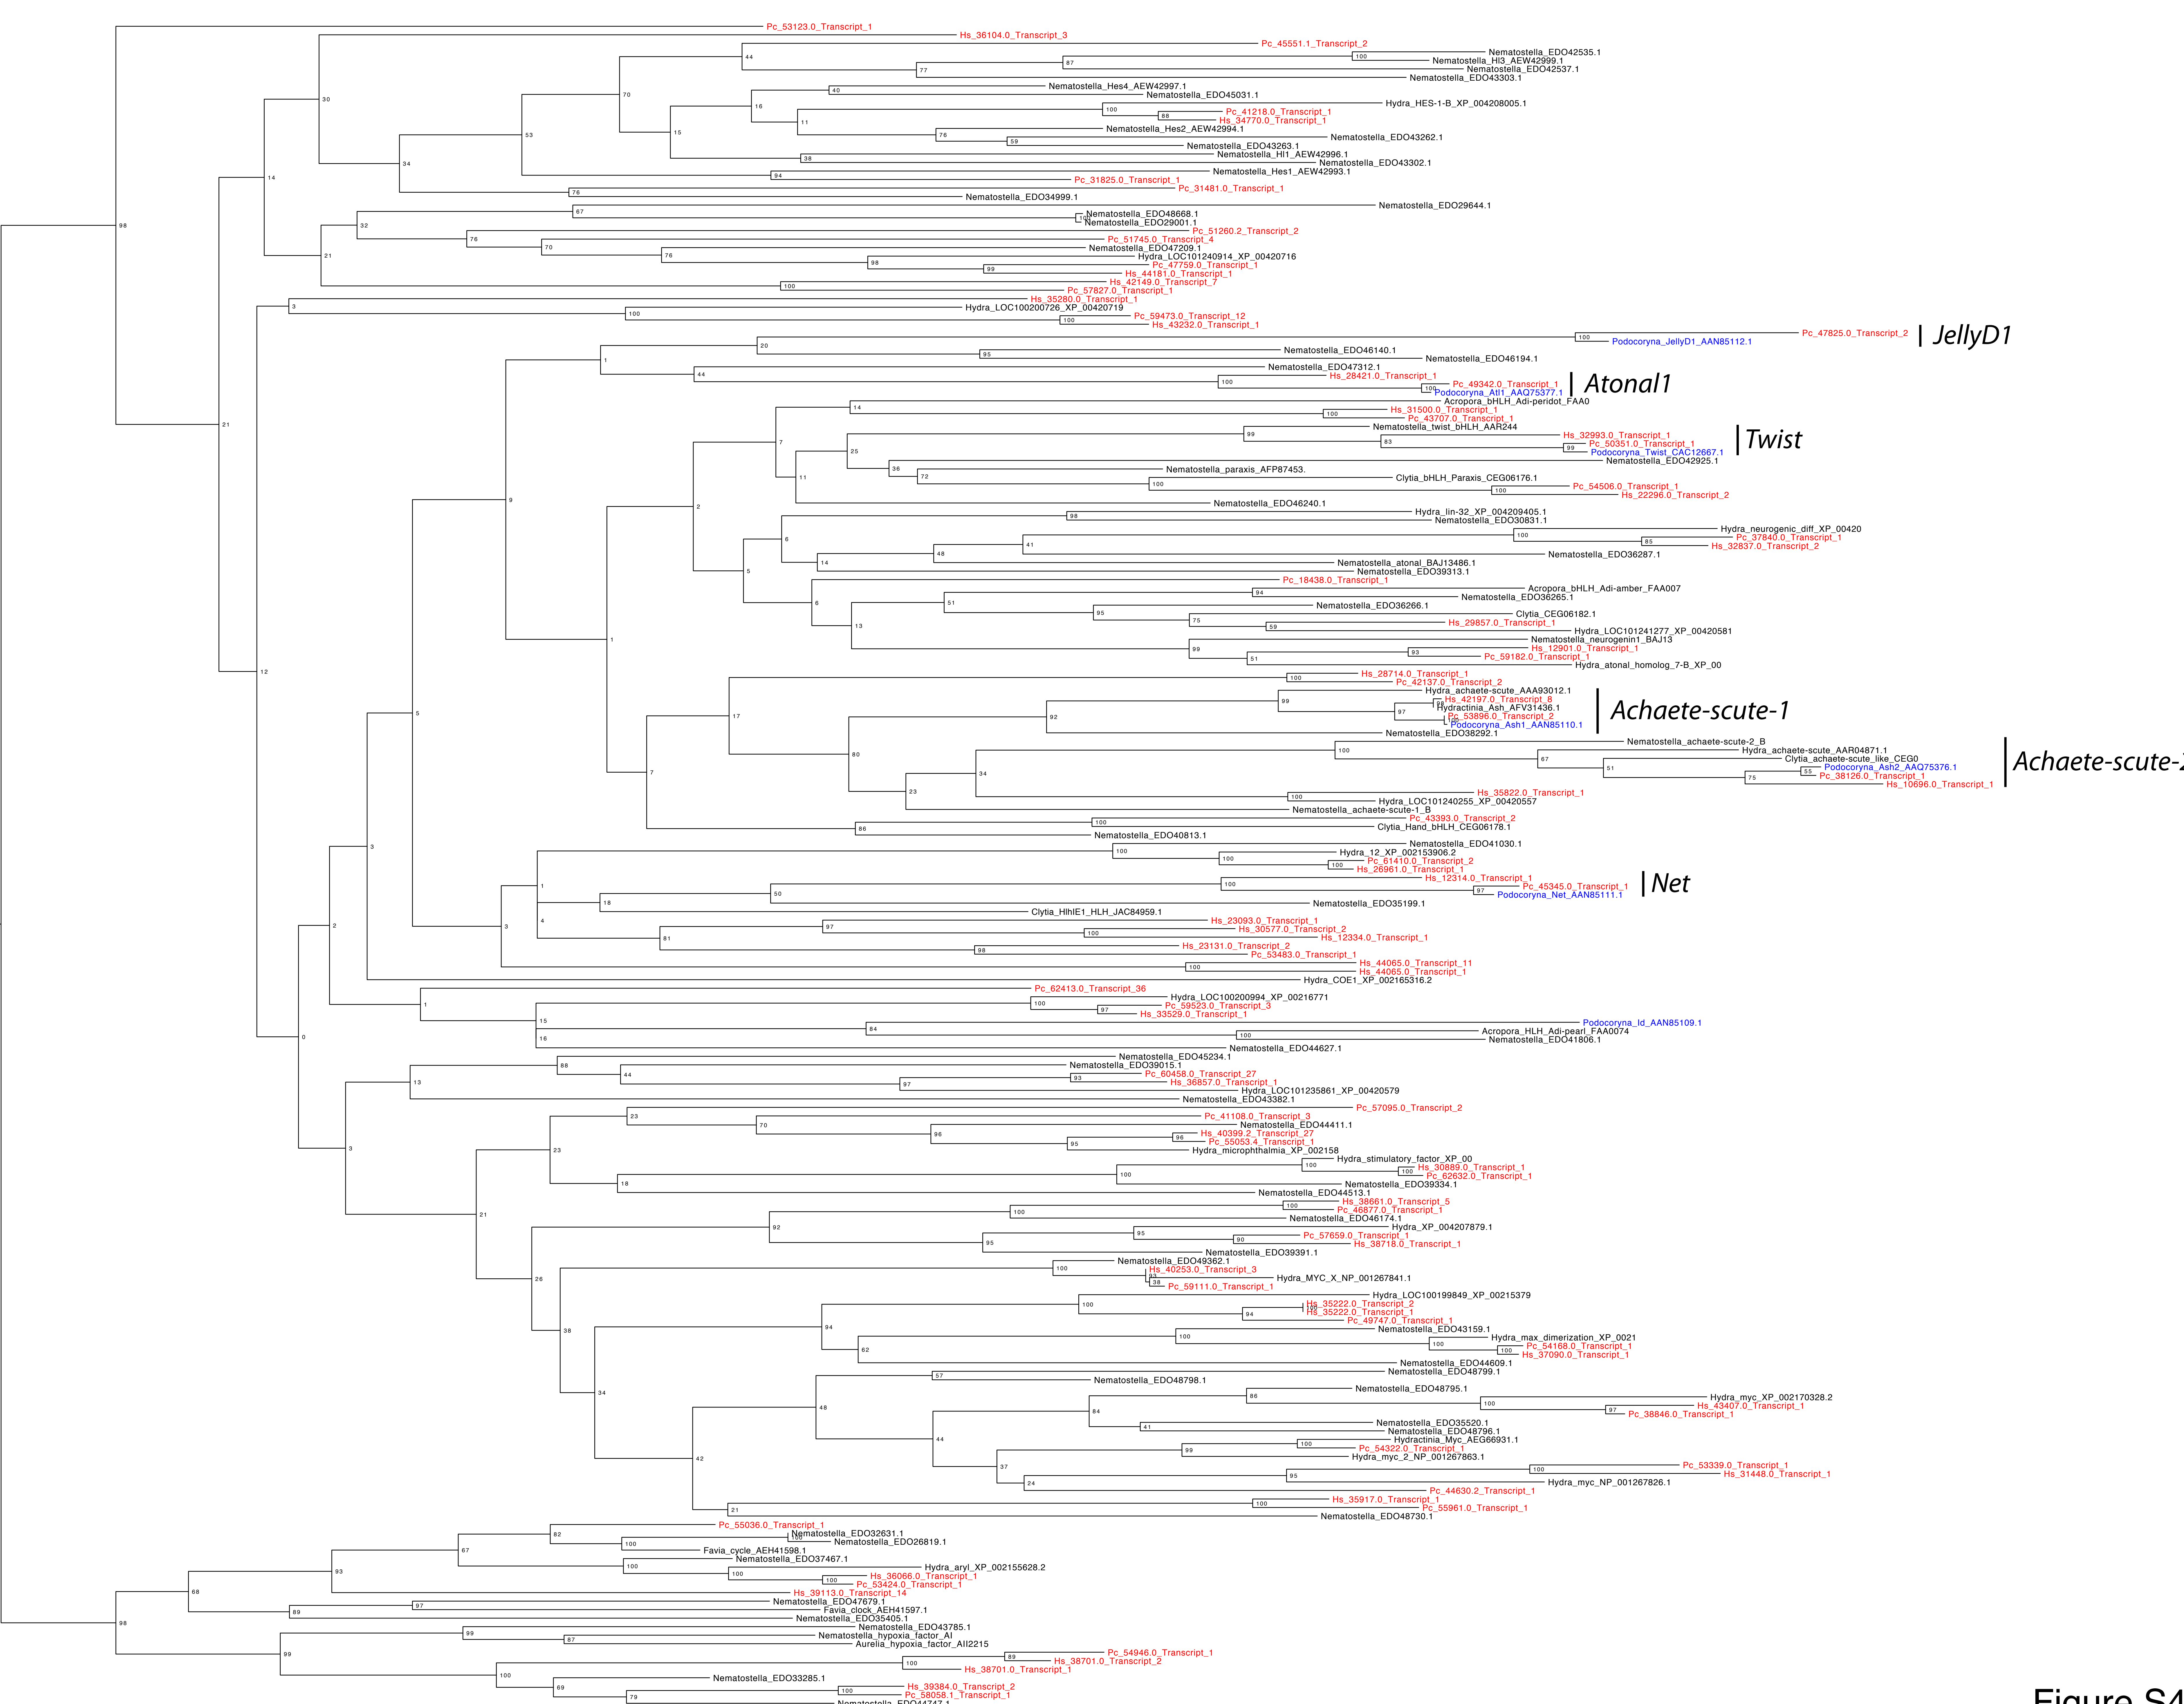

Figure S4

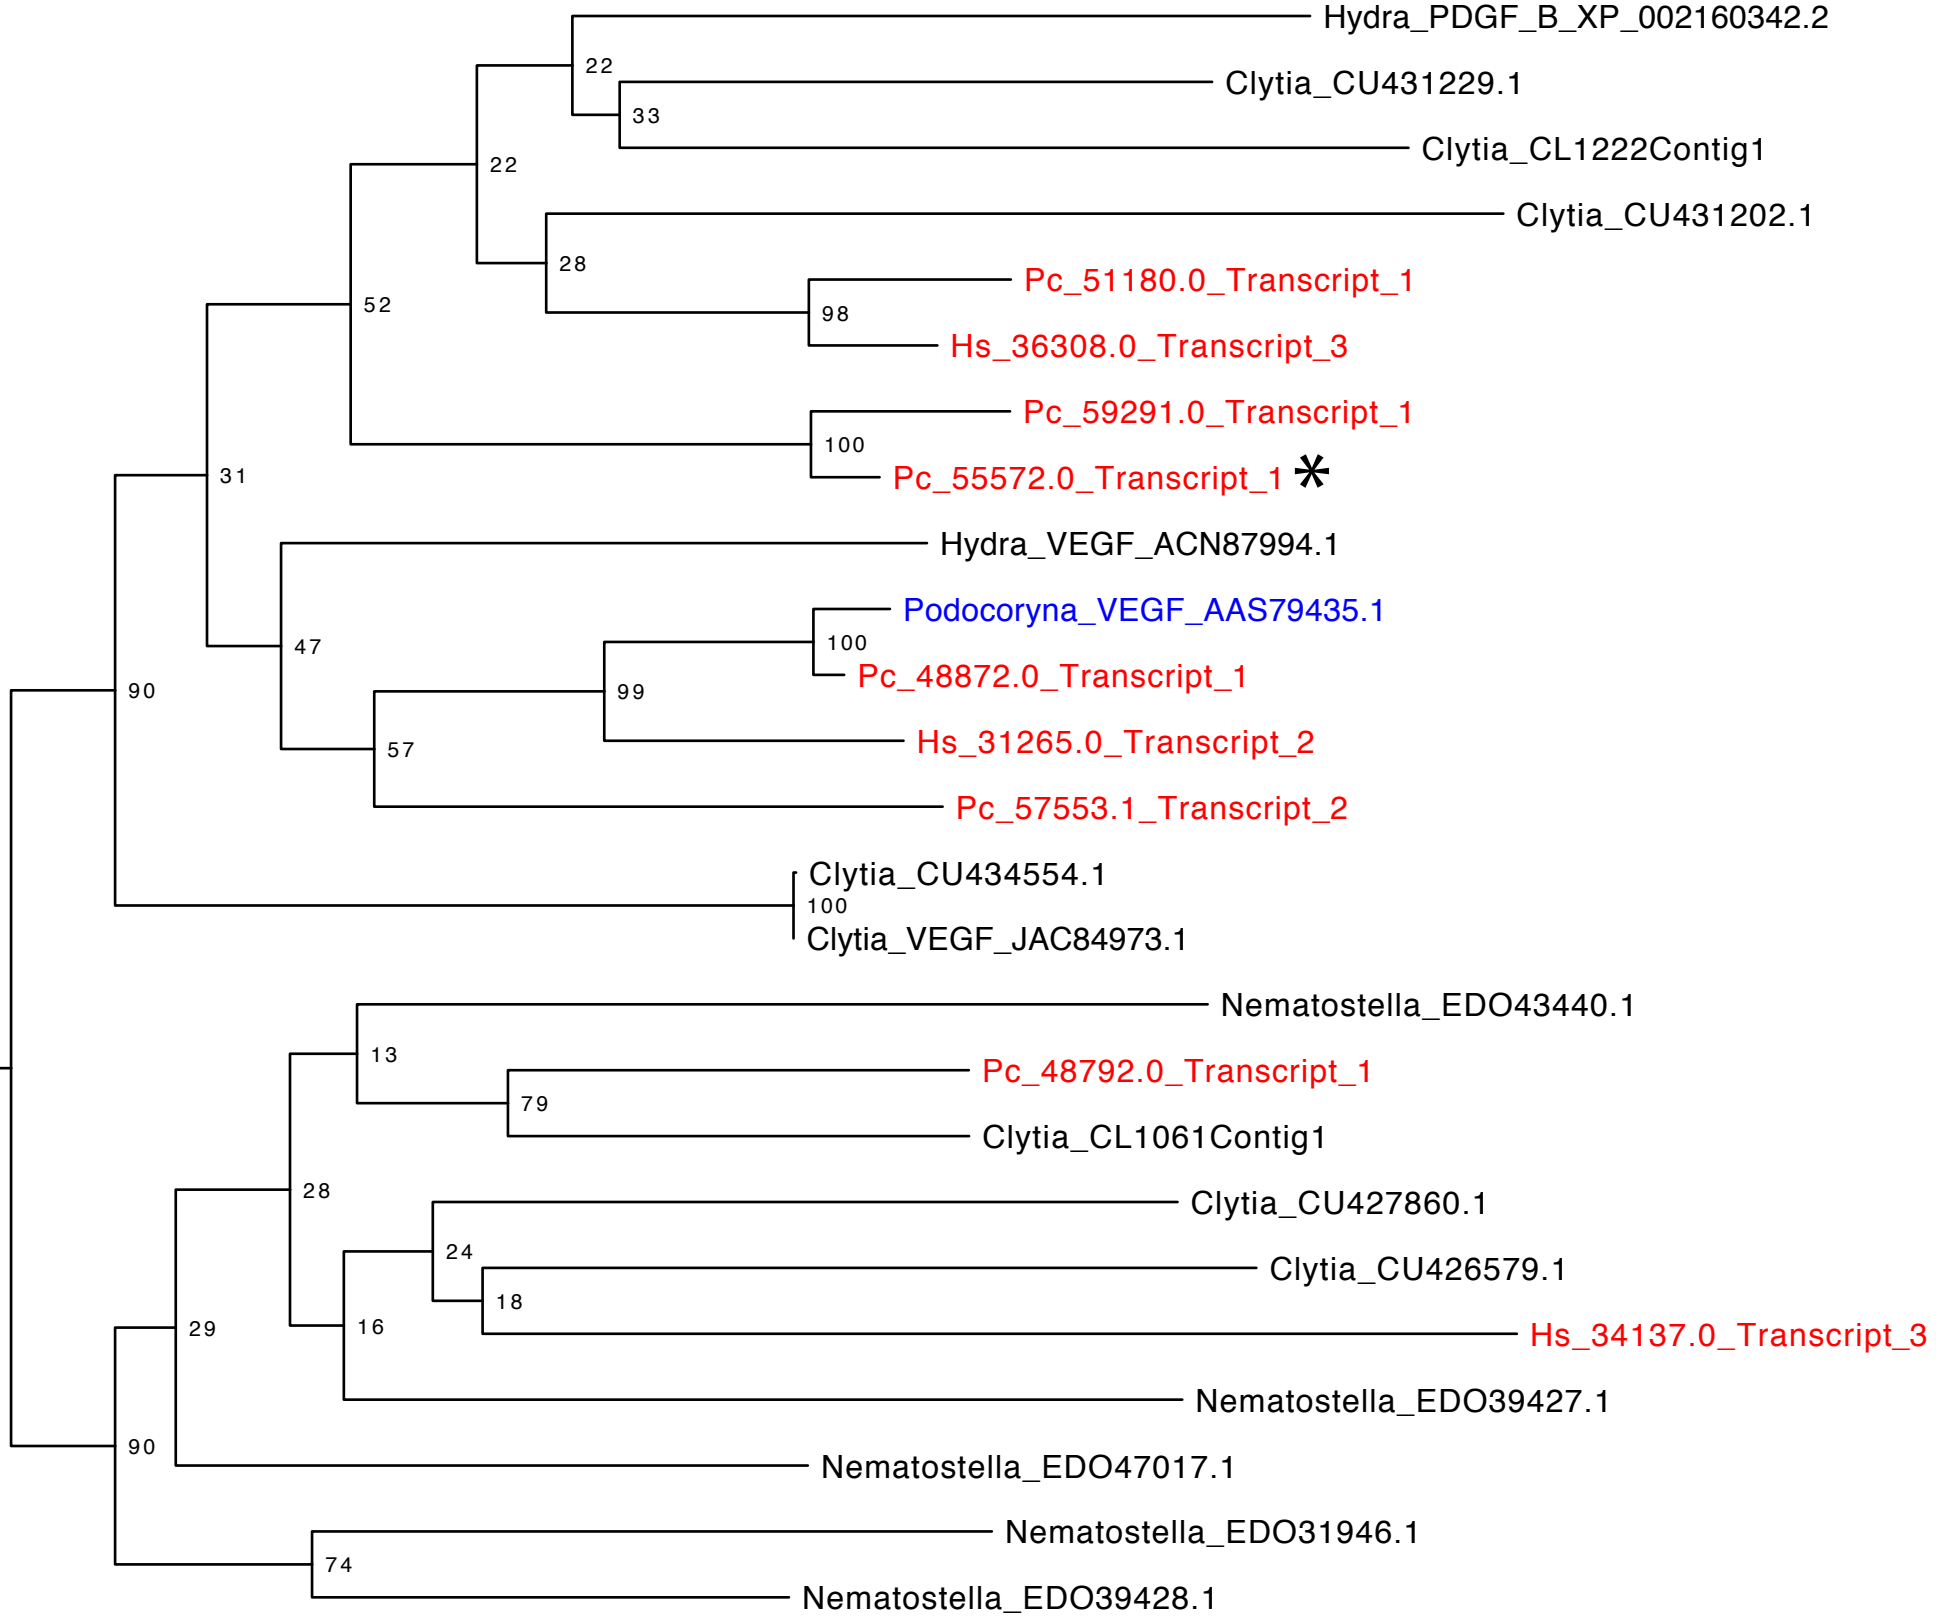

Figure S5

Supplement: supp_evv153_SupplementaryFigures.pdf [file supp_evv153_SupplementaryFigures.pdf]
